# Supplementary material for: The Role of Place in Disparities Affecting Black Men Receiving Hemodialysis
Source: PubMed Central journal article supplement — Kidney Int Rep. 2020 Oct 20;6(2):357–65. doi: 10.1016/j.ekir.2020.10.014 (PMC7879205; doi:10.1016/j.ekir.2020.10.014), 2020-10-20

## **Supplementary Index**

Table S1: Association of Hospitalization with Percent Black Residents Dichotomized at 30

| <b>Association of Hospitalization Rate and community racial composition in Black male patients (by race) during enrollment in DOPPS</b><br><br>N=702<br><br><b>Total number of hospitalizations: 1328</b> | Exposure variables<br><br>IRR for Black Community vs non- Black Community (referent) | P value |
|-----------------------------------------------------------------------------------------------------------------------------------------------------------------------------------------------------------|--------------------------------------------------------------------------------------|---------|
| Unadjusted Model<br><br>(IRR for hospitalization)                                                                                                                                                         | 1.00(0.76-1.31)                                                                      | 0.99    |
| <b>Model 1-Demographic</b><br><br>+ Age and Vintage and DOPPS Phase                                                                                                                                       | 1.01(0.77-1.32)                                                                      | 0.96    |
| <b>Model 2</b><br><br>Model 1 + Clinical Variables (Psychiatric Illness, Charlson, CAD, DM, HTN, albumin, BMI, hemoglobin)                                                                                | 1.07(0.81-1.42)                                                                      | 0.62    |
| <b>Model 3</b><br><br>Model 1+ dialysis provision (dialysis minutes prescribed, URR, cinacalcet, AVF)                                                                                                     | 0.97(0.73-1.25)                                                                      | 0.75    |
| <b>Model 4</b><br><br>Model 1 + patient behavior (substance use, shortened and missed treatments, fluid removed)                                                                                          | 0.99(0.78-1.27)                                                                      | 0.95    |
| <b>Model 5</b><br><br>Model 1 + Community/Facility characteristics (profit status, size, poverty, insurance, % married, higher education, internet)                                                       | 1.32(0.95-1.83)                                                                      | 0.10    |
| <b>Model 6</b><br><br>Adjustment for all variables used in Models 1-5 (imputed data)                                                                                                                      | 1.04(0.77-1.42)                                                                      | 0.78    |

*IRR - incidence rate ratio; DOPPS – Dialysis Outcomes and Practice Patterns Study; CAD – coronary artery disease; DM – diabetes mellitus; HTN – hypertension; BMI -body mass index; URR- urea reduction ratio; AVF – arteriovenous fistula; Black community -  $\geq 30\%$  Black residents; Non-Black community -  $\leq 30\%$  Black residents*

Table S2 Association of Mortality with Percent Black Residents Dichotomized at 30

| <b>Association of Mortality and community racial composition in Black male patients (by race) during enrollment in DOPPS</b><br><br><b>N=702</b><br><br>Total number of deaths n= 97(13.8%) | HR for death in those treating in Black vs non- Black Community (referent) |      |
|---------------------------------------------------------------------------------------------------------------------------------------------------------------------------------------------|----------------------------------------------------------------------------|------|
| Unadjusted Model                                                                                                                                                                            | 1.27(0.82-1.97)                                                            | 0.28 |
| <b>Model 1-Demographic</b><br><br>+ Age and Vintage and DOPPS Phase                                                                                                                         | 1.36(0.88-2.12)                                                            | 0.17 |
| <b>Model 2</b><br><br>Model 1 + Clinical Variables (Psychiatric Illness, Charlson, CAD, DM, HTN, albumin, BMI, hemoglobin)                                                                  | 1.55(0.97-2.49)                                                            | 0.07 |
| <b>Model 3</b><br><br>Model 1+ dialysis provision (dialysis minutes prescribed, URR, cinacalcet, AVF)                                                                                       | 1.31(0.83-2.09)                                                            | 0.24 |
| <b>Model 4</b><br><br>Model 1 + patient behavior (substance use, shortened and missed treatments, fluid removed)                                                                            | 1.31(0.83-2.07)                                                            | 0.24 |
| <b>Model 5</b><br><br>Model 1 + Community/Facility characteristics (profit status, size, poverty, insurance, % married, higher education, internet)                                         | 1.27(0.70-2.37)                                                            | 0.16 |
| <b>Model 6</b><br><br>Adjustment for all variables used in Models 1-5 (imputed data)                                                                                                        | 1.27(0.66-2.44)                                                            | 0.48 |

*IRR - incidence rate ratio; DOPPS – Dialysis Outcomes and Practice Patterns Study; CAD – coronary artery disease; DM – diabetes mellitus; HTN – hypertension; BMI -body mass index; URR- urea reduction ratio; AVF – arteriovenous fistula; Black community - ≥ 30% Black residents; Non-Black community - ≤ 30% Black residents*

Table S3: Unadjusted Association of Each Community Variable with Outcome

| For every 10% increase in following:<br>N=702                            | Hospitalization<br>(IRR) | p   | Mortality<br>(HR) | p    |
|--------------------------------------------------------------------------|--------------------------|-----|-------------------|------|
| % of households living under the poverty line                            | 1.08(0.99-1.17)          | 0.1 | 1.04(0.88-1.23)   | 0.6  |
| % of households with internet access                                     | 1.04(0.92-1.17)          | 0.6 | 0.85(0.70-1.02)   | 0.1  |
| % of household with Spanish as primary language                          | 1.01(0.93-1.10)          | 0.7 | 0.82(0.69-0.98)   | 0.04 |
| % of households where 1 member has a disability                          | 0.88(0.63-1.21)          | 0.4 | 1.12(0.75-1.69)   | 0.6  |
| % of household with at least one member with Bachelor's degree or higher | 1.02(0.96-1.11)          | 0.4 | 0.96(0.83-1.10)   | 0.5  |

Table S4: Re-examination of Main Analyses with Exposure Variable Categorized as <10% Black residents and >50% Black residents

| Association of outcome with those dialyzing in communities with designated % Black residents (Used imputed database) | Unadjusted (Model 1)<br>N=283 | Model 1 adjusted for demographic & clinical Variables*(Model 2) | Model 2 +adjustment for community variables ** |
|----------------------------------------------------------------------------------------------------------------------|-------------------------------|-----------------------------------------------------------------|------------------------------------------------|
| Hospitalization IRR                                                                                                  |                               |                                                                 |                                                |
| <10%                                                                                                                 | 1                             | 1                                                               | 1                                              |
| >50%                                                                                                                 | 1.62(1.05-2.48)               | 1.77(1.08-2.92)                                                 | 1.82 (1.04-3.40)                               |
| HR for Mortality                                                                                                     |                               |                                                                 |                                                |
| <10%                                                                                                                 | 1                             | 1                                                               | 1                                              |
| >50%                                                                                                                 | 2.14(1.14-4.03)               | 4.23(1.98-9.1)                                                  | 3.17(1.12-9.88)                                |

*IRR - incidence rate ratio; \*Charlson score, diabetes mellitus, hypertension, body mass index, albumin, dialysis minutes prescribed, arteriovenous fistula, shortened or missed treatments. Adjusted for facility profit status, poverty, insurance and higher education.*

Supplementary Figure 1a: Crude Hospitalization Rate by Percentile Increase in Black Residents

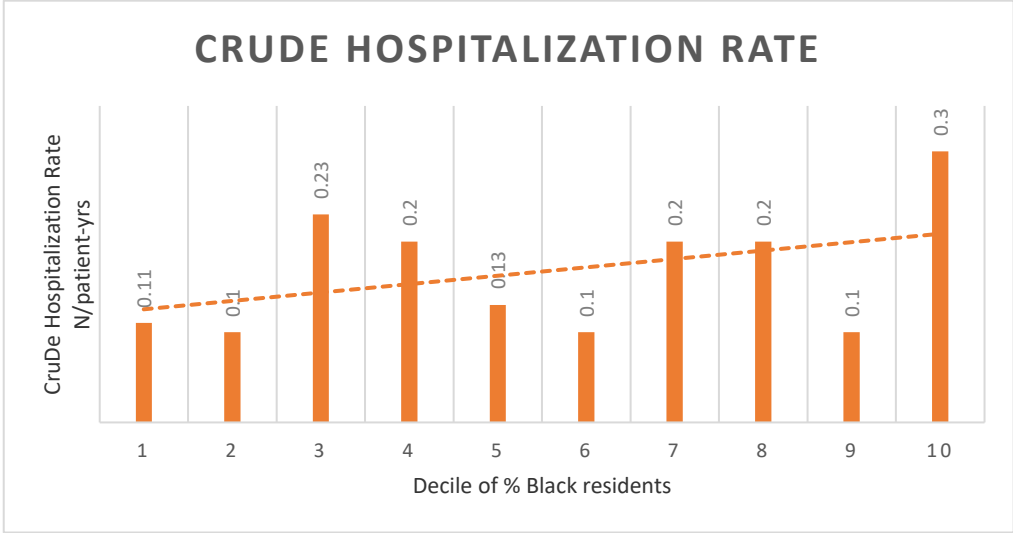

Supplementary Figure 1b: Crude Mortality Rate by Percentile Increase in Black Residents

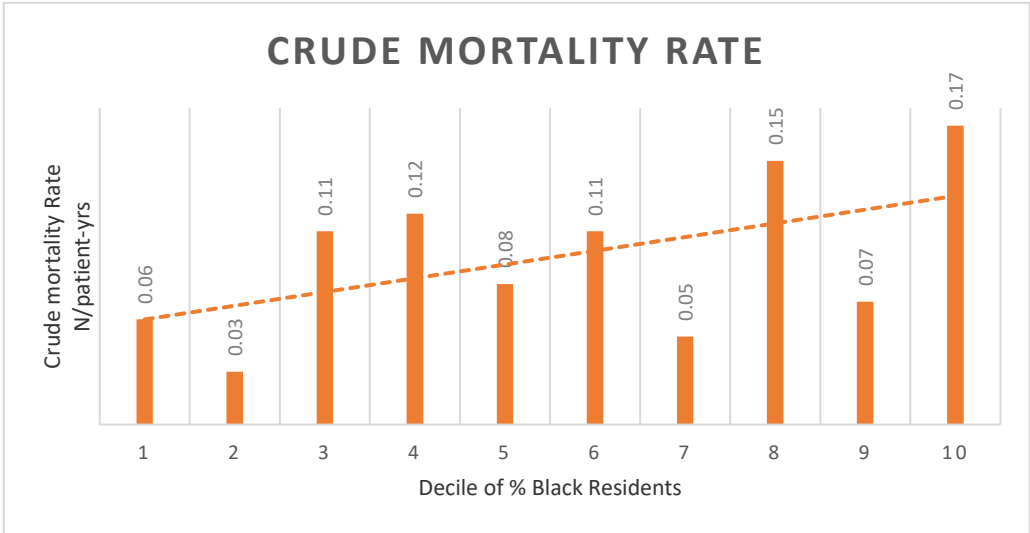

Supplement: mmc1.pdf [file mmc1.pdf]
